# Supplementary material
Source: MDPI journal article supplement (https://www.mdpi.com/2077-1444/12/2/113)
Supplement: s1 [file s1]

Table S1: Sikh American Organizations Established post-9/11/2001  
Registered

| Year Est. | Organization                                                          | Base Location | Purpose                                                 | Millennials* total/percentage | Gender                        |
|-----------|-----------------------------------------------------------------------|---------------|---------------------------------------------------------|-------------------------------|-------------------------------|
| 2001      | Sikh Coalition                                                        | USA           | Civil Rights/ Advocacy; Education; Media                | 13/14= 93%                    | M: 5/14= 36%<br>F: 9/14= 64%  |
| 2001      | Sikhness                                                              | USA           | Seva & Charity                                          | No info                       | No info                       |
| 2002      | Kaur Foundation                                                       | USA           | Women; Public Relations & Education                     | No info                       | No info                       |
| 2003      | Sikh Research Institute                                               | USA           | Cultural Preservation & Sikh Education                  | 6/8= 75%                      | M: 20/24= 83%<br>F: 4/24= 17% |
| 2004      | Kaurs United (CA branch)                                              | USA           | Women; Cultural Preservation & Sikh Education           | No info                       | No info                       |
| 2004      | ENSAAF                                                                | USA           | Civil Rights/ Advocacy                                  | 7/7= 100%                     | M: 2/7= 29%<br>F: 5/7= 71%    |
| 2005      | The Jakara Movement                                                   | USA           | Education; Youth and Community Services; Seva & Charity | 4/4= 100%                     | 2/4=50%<br>2/4=50%            |
| 2006      | Sikh Sports Association of USA                                        | USA           | Youth and Community Services                            | 0/10= 0%                      | M: 10/10=100%<br>F: 0/10=0%   |
| 2006      | The Surat Initiative                                                  | USA           | Cultural Preservation & Sikh Education                  | 12/12=100%                    | M: 6/12=50%<br>F: 6/12=50%    |
| 2006      | Sikh Encyclopedia                                                     | India         | Public Relations & Education                            | No info                       | No info                       |
| 2007      | Sikhs for Justice                                                     | USA           | Civil Rights/ Advocacy                                  | 0/2=0%                        | M: 2/2=100%<br>F: 0/2=0%      |
| 2008      | Sikh Relief (formerly Sikh Organization for Prisoners Welfare (SOPW)) | UK            | Seva & Charity                                          | No info                       | No info                       |
| 2008      | Saanjh Retreat                                                        | USA           | Youth and Community Services                            | No info                       | No info                       |
| 2009      | Sikh Family Center                                                    | USA           | Youth and Community Services; Seva & Charity            | 3/6= 50%                      | M: 1/6=17%<br>F: 5/6=83%      |
| 2009      | Sikh Channel                                                          | USA           | Media                                                   | No info                       | No info                       |
| 2010      | SAFAR: The Sikh Feminist Research Institute                           | Canada        | Cultural Preservation & Sikh Education; Women           | 5/6= 83%                      | F: 100%                       |
| 2010      | Bhagat Puran Health Initiative (BPSHI)                                | USA           | Seva & Charity; Community Services                      | 100%                          |                               |
| 2010      | Punjabi Cultural Association of the Central Valley Inc.               | USA           | Cultural Preservation & Sikh Education                  | No info                       | No info                       |
| 2010      | Sikh Empowerment Voluntary Association (SEVA)                         | USA           | Seva & Charity                                          | No info                       | No info                       |
| 2010      | Dasvandh Network                                                      | USA           | Seva, Charity, Cultural Preservation & Sikh Education   | 6/7= 86%                      | M:3/7= 43%<br>F: 4/7=57%      |
| 2011      | Sikh American Chamber of                                              | USA           | Cultural Preservation & Sikh Education                  | No info                       | No info                       |

|         |                                              |                                                   |                                                       |          |                            |
|---------|----------------------------------------------|---------------------------------------------------|-------------------------------------------------------|----------|----------------------------|
|         | Commerce                                     |                                                   |                                                       |          |                            |
| 2011    | Sikh Women Now                               | USA                                               | Women; Seva & Charity                                 | No info  | No info                    |
| 2013    | Sikh Women Alliance Inc.                     | Britain/ UK                                       | Women; Seva & Charity                                 | 1/6= 17% | M: 0/6= 0%<br>F: 6/6= 100% |
| 2013    | Portrait of Sikhs                            | UK                                                | Cultural; Blog/ Website; Public Relations & Education | 1/1=100% | M: 1/1= 100%<br>F: 0/1= 0% |
| 2014    | National Sikh Campaign                       | USA                                               | Media; Public Relations & Education                   | No info  | No info                    |
| Unknown | Sikh Youth Alliance of North America (SYANA) | North America                                     | Youth and Community Services                          | No info  | No info                    |
| Unknown | Sikhs for Technology                         | North America, Europe                             | Youth and Community Services                          | No info  | No info                    |
| Unknown | 5rivers Foundation                           | USA                                               | Cultural Preservation                                 | No info  | No info                    |
| Unknown | Sikh24.com                                   | India, Europe, Australia, Pacific, Asia, Americas | Media; News                                           | No info  | No info                    |

Table S2: Sikh American Organizations Established post-9/11/2001  
Not Registered/ For-Profit

| Year Est. | Organization                                                  | Location | Purpose                                                                    | Millennials-<br>total/percentage | Gender                       |
|-----------|---------------------------------------------------------------|----------|----------------------------------------------------------------------------|----------------------------------|------------------------------|
| 2004      | Rootsgear                                                     | USA      | Cultural; Website                                                          | 100%                             | M: 2/2= 100%<br>F: 0/2= 0%   |
| 2007      | The Langar Hall                                               |          | Website; Public Relations & Education                                      | No info                          | No info                      |
| 2010      | 1984 Living History Project (founded at Saanjh youth retreat) | USA      | Media, Cultural Preservation & Sikh Education                              | No info                          | No info                      |
| 2010      | American Turban                                               | USA      | Blog; Cultural Preservation & Sikh Education                               | 1/1=100%                         | M: 1/1= 100%                 |
| 2011      | Sikh Love Stories Project                                     | USA      | Cultural Preservation & Sikh Education; Women                              | 3/6=50%                          | M: 0/6= 0%<br>F: 6/6= 100%   |
| 2011      | Kaurista                                                      |          | Blog; Cultural; Women                                                      | No info                          | No info                      |
| 2012      | American Sikh Political Action Committee                      | USA      | Civil Rights/ Advocacy; Public Relations & Education                       | No info                          | No info                      |
| 2012      | Kaur Life                                                     | USA      | Women; Cultural; Online Magazine                                           | 2/2= 100%                        | M: 0/2= 0%<br>F: 2/2= 100%   |
| 2012      | 2 Brown Girls                                                 | UK       | Website; Women; Cultural Preservation & Sikh Education                     | 2/2=100%                         | M: 0/2=0%<br>F: 2/2=100%     |
| 2013      | Singh Street Style                                            | UK       | Website; Online Store; Cultural Preservation; Public Relations & Education | 1/1=100%                         | M: 1/1=100%<br>F: 0/1=0%     |
| Unknown   | Sikh Chic                                                     | Canada   | Website; Cultural Preservation & Sikh Education; Youth                     | No info                          | M: 1/1 = 100%<br>F: 0/1 = 0% |

Table S3: Sikh American Organizations Established pre-9/11/2001  
Registered

| Year Est.  | Organization                                                                                                       | Location                                    | Purpose                                                                                            | Millennials-<br>total/percentage                                                                                                                                | Gender                         |
|------------|--------------------------------------------------------------------------------------------------------------------|---------------------------------------------|----------------------------------------------------------------------------------------------------|-----------------------------------------------------------------------------------------------------------------------------------------------------------------|--------------------------------|
| 1967       | Sikh Foundation International                                                                                      | USA                                         | Education; Community Empowerment; Cultural Preservation                                            | 4/16=25%                                                                                                                                                        | M: 13/16= 81%<br>F: 3/16= 19%  |
| Late 1970s | Sikh Dharma International                                                                                          | USA                                         | Cultural Preservation & Sikh Education                                                             | 0/10= 0%<br><a href="https://www.sikhdharm&lt;br/&gt;a.org/staff/">https://www.sikhdharm<br/>a.org/staff/</a>                                                   | M: 2/9= 22%<br>F: 7/9= 78%     |
| 1984       | Association of Sikh Professionals (ASP)                                                                            | USA                                         | Cultural Preservation & Sikh Education                                                             | 0/4= 0%                                                                                                                                                         | M: 4/4= 100%<br>F: 0/4= 0%     |
| 1984       | World Sikh Council                                                                                                 | India                                       | Cultural Preservation & Sikh Education; Public Relations & Education                               | <a href="http://www.worldsikhc&lt;br/&gt;ouncil.org/about/com&lt;br/&gt;mittee.html">http://www.worldsikhc<br/>ouncil.org/about/com<br/>mittee.html</a> No info | No info                        |
| 1984       | Sikhnet.com                                                                                                        | USA                                         | News; Cultural Preservation & Sikh Education                                                       | No info                                                                                                                                                         | No info                        |
| 1985       | Sikh Human Rights Group (SHRG)                                                                                     | Britain                                     | Public Relations & Education; Civil Rights/ Advocacy                                               | No info                                                                                                                                                         | No info                        |
| 1992       | North American Sikh Medical and Dental Association (NASMDA)                                                        | USA                                         | Cultural Preservation & Sikh Education                                                             | 0/13= 0%                                                                                                                                                        | M: 10/13= 77%<br>F: 3/13= 23%  |
| 1993       | Punjabi American Heritage Society (PAHS)                                                                           | USA                                         | Cultural Preservation & Sikh Education                                                             | 0/40= 0%                                                                                                                                                        | M: 22/40= 55%<br>F: 18/40= 45% |
| 1995       | SikhLens                                                                                                           | USA                                         | Media; Cultural Preservation & Education                                                           | No info                                                                                                                                                         | M: 1/2 = 50%<br>F: 1/2 = 50%   |
| 1996       | American Sikh Council (formerly World Sikh Council- America Region)                                                | USA                                         | Cultural Preservation & Sikh Education; Public Relations & Education                               | 0/15=0%                                                                                                                                                         | M: 12/15= 80%<br>F: 3/15= 20%  |
| 1996       | Sikh American Legal Defense and Education Fund (SALDEF) (formerly Sikh Mediawatch and Resource Task Force (SMART)) | USA                                         | Civil Rights/ Advocacy; Media                                                                      | 3/3=100%                                                                                                                                                        | No Info                        |
| 1998       | Sikh Council on Religion and Education (SCORE)                                                                     | USA                                         | Public Relations & Education; Civil Rights/ Advocacy                                               | 0/ 14                                                                                                                                                           | M: 13/14= 93%<br>F: 1/14= 7%   |
| 1998       | Sikh Awareness Society (SAS)                                                                                       | Britain/ UK                                 | Cultural Preservation & Sikh Education; Public Relations & Education; Youth and Community Services | No info                                                                                                                                                         | No info                        |
| 1999       | United Sikhs                                                                                                       | Asia-Pacific, Africa, Europe, North America | Civil Rights/ Advocacy; Seva & Charity                                                             | No info                                                                                                                                                         | No info                        |
| 1999       | Sikh Videos                                                                                                        | India                                       | Media                                                                                              | No info                                                                                                                                                         | No info                        |
| 2010       | Nishkam Sikh Welfare Organization USA Inc.                                                                         | USA                                         | Seva & Charity                                                                                     | No info                                                                                                                                                         | No info                        |

|         |                              |         |                                        |         |         |
|---------|------------------------------|---------|----------------------------------------|---------|---------|
| 2010    | Nishkam Sikh Welfare Council | India   | Seva & Charity                         | No info | No info |
| Unknown | AllAboutSikhs.com            | Unknown | Cultural Preservation & Sikh Education | No info | No info |

Table S4: Sikh American Organizations Established pre-9/11/2001  
Inactive/ Banned

| Year Est.        | Organization                                                                                     | Location | Purpose                                                              | Millennials Total/percentage                                                      | Gender |
|------------------|--------------------------------------------------------------------------------------------------|----------|----------------------------------------------------------------------|-----------------------------------------------------------------------------------|--------|
| 1968 (banned)*** | Sikh Youth Federation USA                                                                        | USA      | Youth; Cultural Preservation & Sikh Education                        | N/A                                                                               | N/A    |
| 1997 (inactive)  | F.A.T.E.H.- The Fellowship of Activists to Embrace Humanity                                      | USA      | Seva & Charity                                                       | N/A                                                                               | N/A    |
| 1984 (inactive)  | World Sikh Organization Canada (WSO-Canada) (America Region still active: American Sikh Council) | Canada   | Cultural Preservation & Sikh Education; Public Relations & Education | <a href="http://www.worldsikh.org/our_team">http://www.worldsikh.org/our_team</a> | N/A    |

\*Millennials = Those born between 1980-2000 and are ages 16-36 years old.

\*\*"Public Relations & Education" indicates audience is non-Sikh

\*\*\*"Cultural Preservation & Sikh Education" indicates audience is Sikh community

\*\*\*Banned under new US terrorism legislation. Added to the [US Treasury Department](#) terrorism list on June 27, 2002. In April 2004, ISYF added to US terror list, allowing the US to deny entry (and to deport) any of its members.

[https://en.wikipedia.org/wiki/International\\_Sikh\\_Youth\\_Federation#Bannings](https://en.wikipedia.org/wiki/International_Sikh_Youth_Federation#Bannings)
